# Supplementary material for: Environmental and Genetic Variation for Yield-Related Traits of Durum Wheat as Affected by Development
Source: PubMed Central journal article supplement (PMC5778143; doi:10.3389/fpls.2018.00008), 2018-01-18
Supplement: Image1.pdf [file Image1.pdf]

# 1B

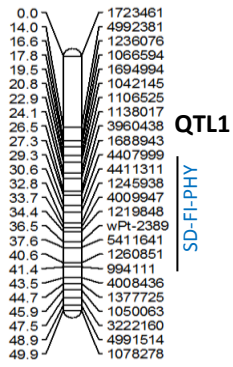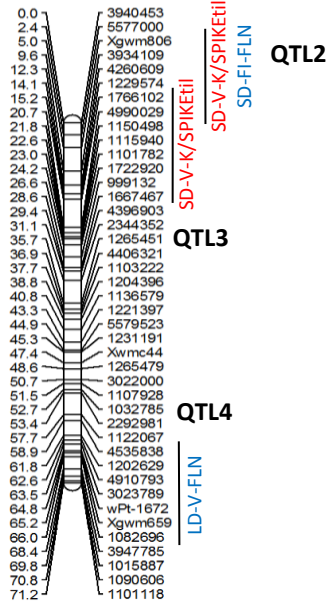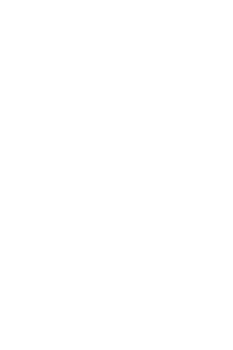

# 2A

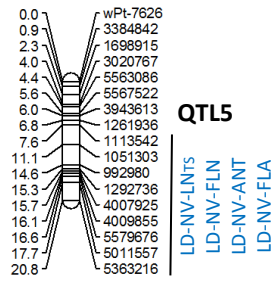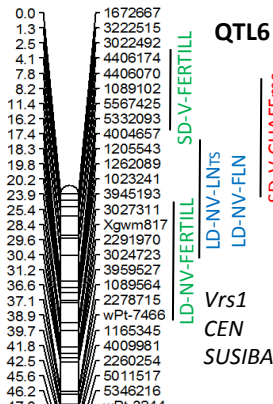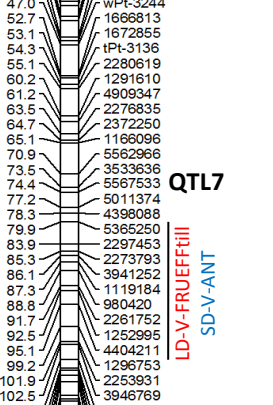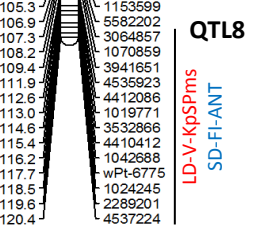

Ppd-B1 →

# 2B

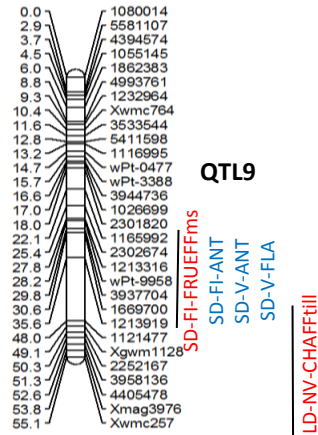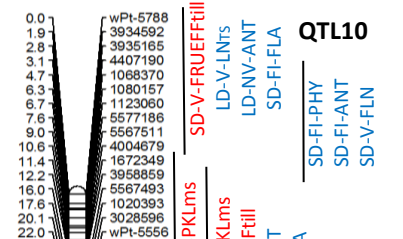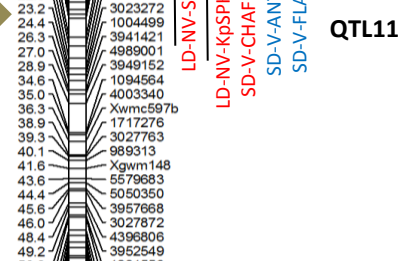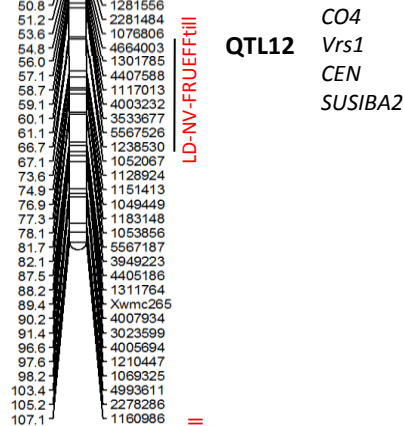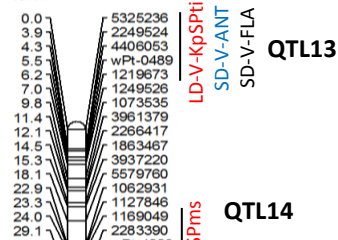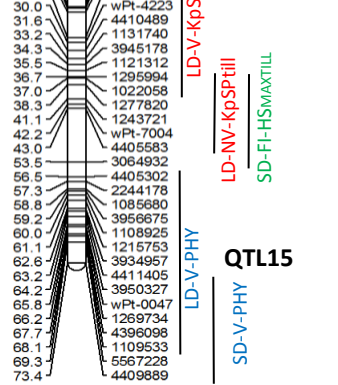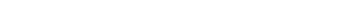

3A

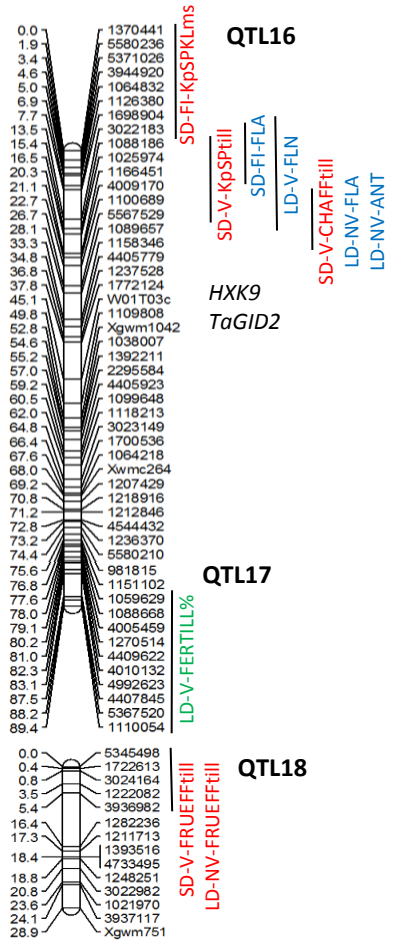

3B

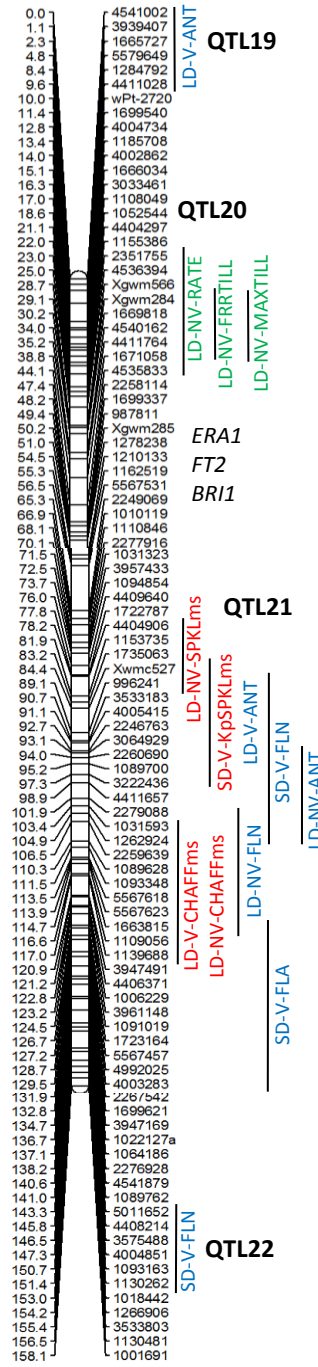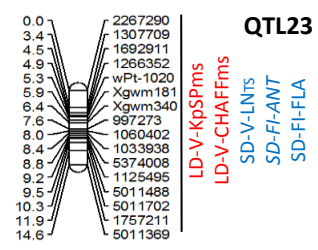

4A

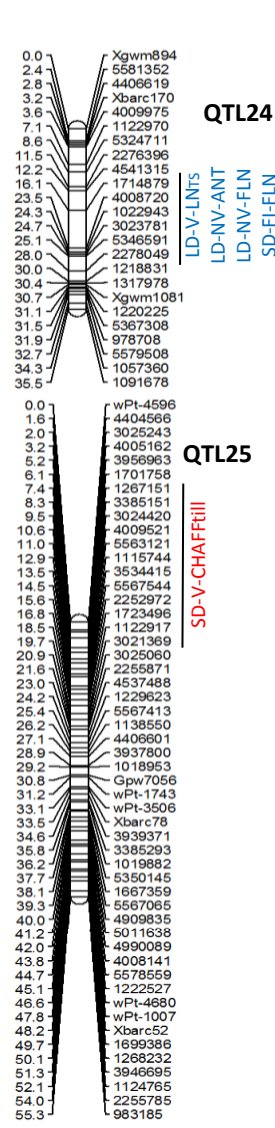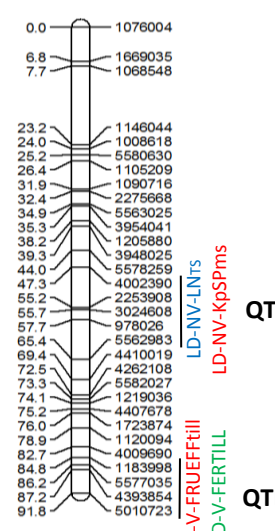

4B

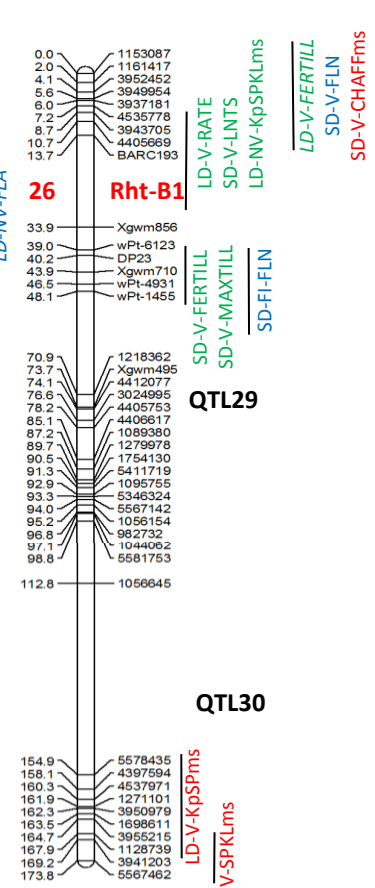

QTL28

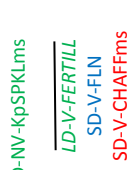

QTL29

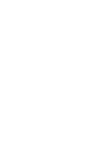

QTL30

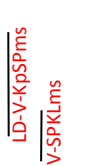

QTL26

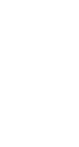

QTL27

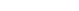



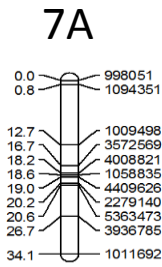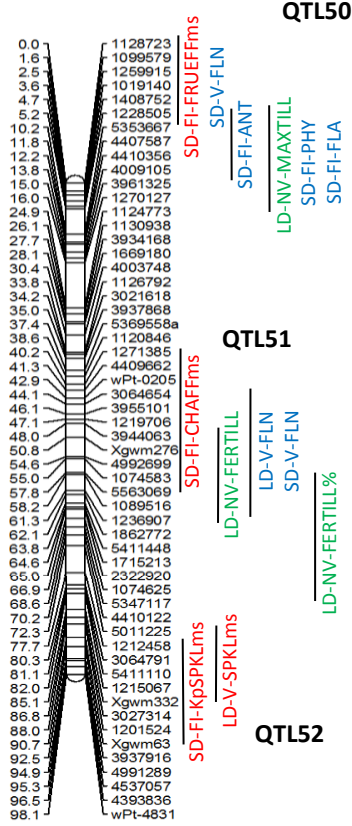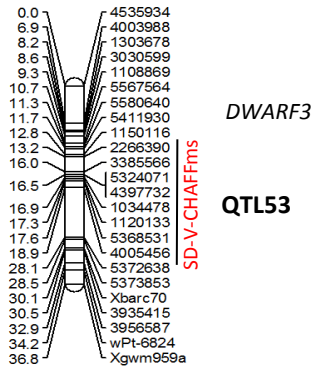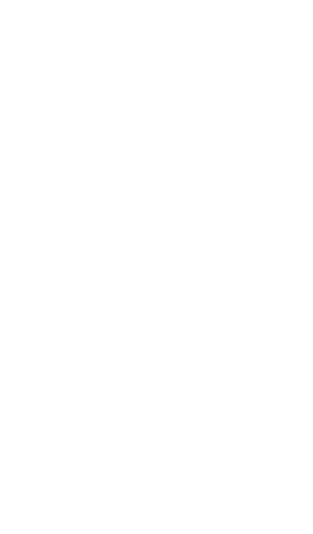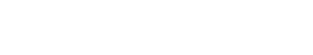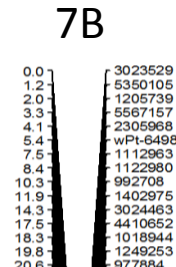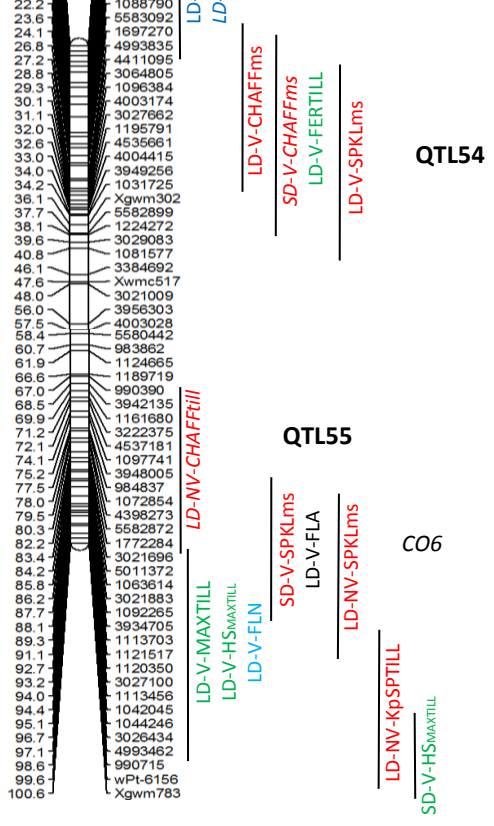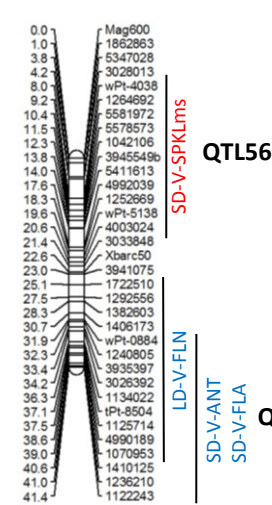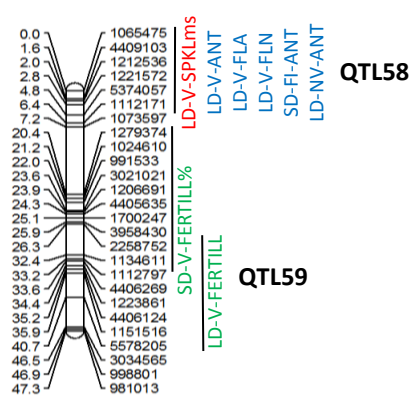

Figure S1. Chromosomal regions harbouring QTLs for phenological (blue), tillering (green) and fertility (red) traits. The suffix 'ms' stands for main stem, 'till' for tiller.
